# Supplementary material for: Sulfated polysaccharide of Sepiella maindroni ink targets Akt and overcomes resistance to the FGFR inhibitor AZD4547 in bladder cancer
Source: publisher site journal article supplement (doi:10.18632/aging.102286), 2019-09-23
Supplement: Supplementary file 1 [file aging-v11i18-102286-supplementary-material-SD1.pdf]

## SUPPLEMENTARY FIGURE

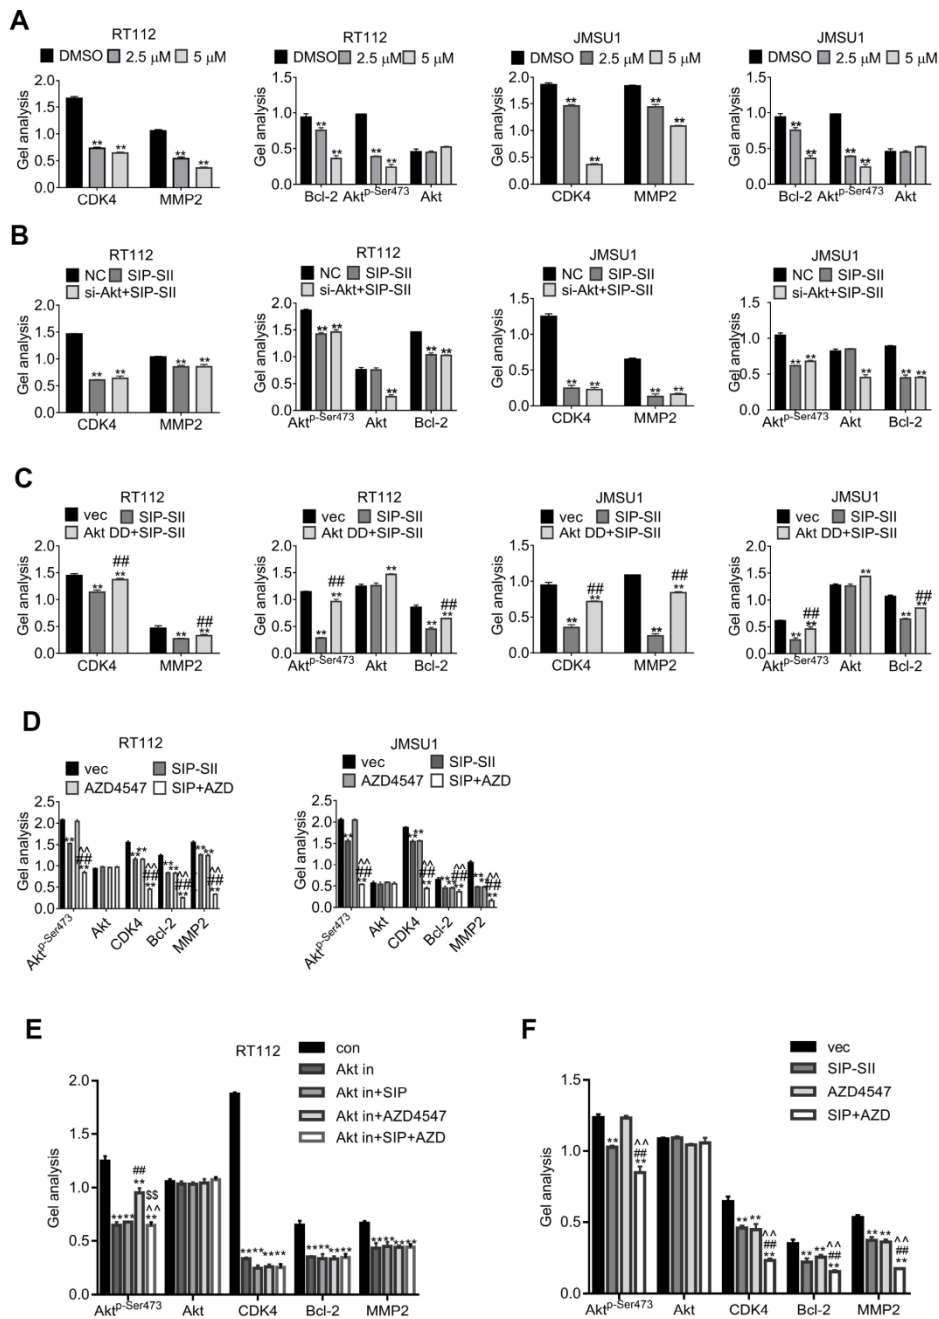

**Supplementary Figure 1. Gel analysis of repeated western blots.** (A) RT112 and JMSU1 cells were treated with DMSO, or 2.5  $\mu$ M (RT112) and 5.0  $\mu$ M SIP-SII (JMSU1) for 24 h. (B) RT112 and JMSU1 cells were treated with DMSO, SIP-SII, or the combination of SIP-SII and si-Akt for 24 h. (C) RT112 and JMSU1 cells were treated with DMSO, SIP-SII, or the combination of SIP-SII and Akt DD for 24 h. (D) RT112 and JMSU1 cells were treated with DMSO, 5.0  $\mu$ M SIP-SII, 100 nM AZD4547, or SIP-SII combined with AZD4547. (E) RT112 and JMSU1 cells were treated with DMSO, 5.0  $\mu$ M SIP-SII, 100 nM AZD4547, or SIP-SII combined with AZD4547 in the presence of 0.5  $\mu$ M BKM120. In all cases, analyses were carried out 24 h post-treatment. \*\* vs. Con, ## vs. AKT IN, ^^ vs. AKT IN+SIP, \$\$ vs. AKT IN+AZD. \*\*, ##, ^^ and \$\$ indicated  $p < 0.01$ ,  $n=3$ . (F) Western blot analysis of tumor xenograft samples from mice treated with saline, SIP-SII, AZD4547, or the combination of SIP-SII and AZD4547. Data obtained from three individual experiments were analyzed by ImageJ. \*\*, ##, and ^^ indicated  $P < 0.01$ ,  $n=3$ .
